# Supplementary material for: Manipulation of nonlinear optical responses in layered ferroelectric niobium oxide dihalides
Source: Springer Nature journal article supplement (doi:10.1038/s41467-023-41383-7), 2023-09-22
Supplement: MOESM1 [file 41467_2023_41383_MOESM1_ESM.pdf]

# Supplementary Information

## Manipulation of Nonlinear Optical Responses in Layered Ferroelectric Niobium Oxide Dihalides

This PDF file includes:

Supplementary Fig. 1: Metal-to-insulator phase transition.

Supplementary Fig. 2: Band structures for NbOCl<sub>2</sub> with different layer thicknesses.

Supplementary Fig. 3: Symmetry selection rules for bulk and monolayer NbOCl<sub>2</sub>.

Supplementary Fig. 4: Five independent shift current susceptibility components in monolayer NbOCl<sub>2</sub>.

Supplementary Fig. 5: Band structures for monolayer NbOCl<sub>2</sub> under different uniaxial strains.

Supplementary Fig. 6: The  $(0, k, l)$  reflections of NbOCl<sub>2</sub> obtained by single crystal X-ray diffraction.

Supplementary Fig. 7: The  $(0, k, l)$  reflections of NbOI<sub>2</sub> obtained by single crystal X-ray diffraction.

Supplementary Fig. 8: Normalized SHG intensity of single-crystal NbOCl<sub>2</sub> as a function of temperature.

Supplementary Fig. 9: Total density of states (TDOS) of the bulk NbOCl<sub>2</sub> under different pressures (*left* panel) and temperatures (*right* panel).

Supplementary Fig. 10: Nonlinear optical responses for monolayer NbOX<sub>2</sub> ( $X = \text{Cl, Br, I}$ ).

Supplementary Fig. 11: Band structures with scissor operators for NbOX<sub>2</sub> ( $X = \text{Cl, Br, I}$ ).

Supplementary Fig. 12: SHG Responses in NbOBr<sub>2</sub>.

Supplementary Fig. 13: SHG Responses in NbOI<sub>2</sub>.

Supplementary Fig. 14: Convergence tests on the density of k-grid for NLO responses.

Supplementary Fig. 15: XRD of the synthesized single crystal NbOI<sub>2</sub>.

Supplementary Note 1: Symmetry selection rules in bulk and monolayer NbOCl<sub>2</sub>.

Supplementary Note 2: Expand of the generalized derivative of the dipole matrix element by using sum rule.

Supplementary Tables 1-21: Structure information of bulk NbOCl<sub>2</sub> and NbOI<sub>2</sub> by using single-crystal X-ray diffraction analysis.

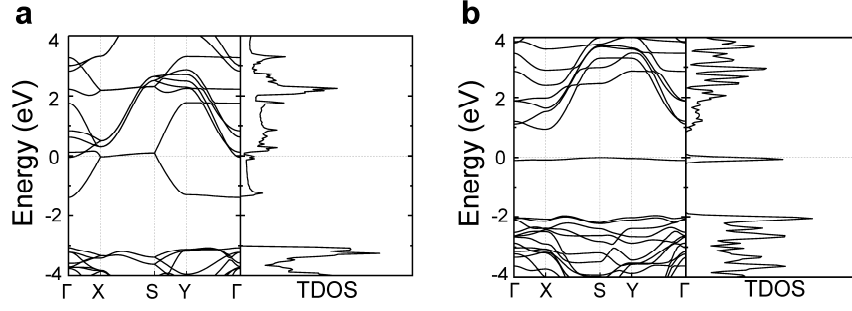

**Supplementary Fig. 1 | Metal-to-insulator phase transition.** **a** Band structure and total density of states (DOS) of monolayer NbOCl<sub>2</sub> without Peierls distortion, showing a metallic feature. **b** Same as **a** but for monolayer NbOCl<sub>2</sub> with the Peierls distortion formed by Nb atoms, showing an insulating feature. Fermi level is set to zero.

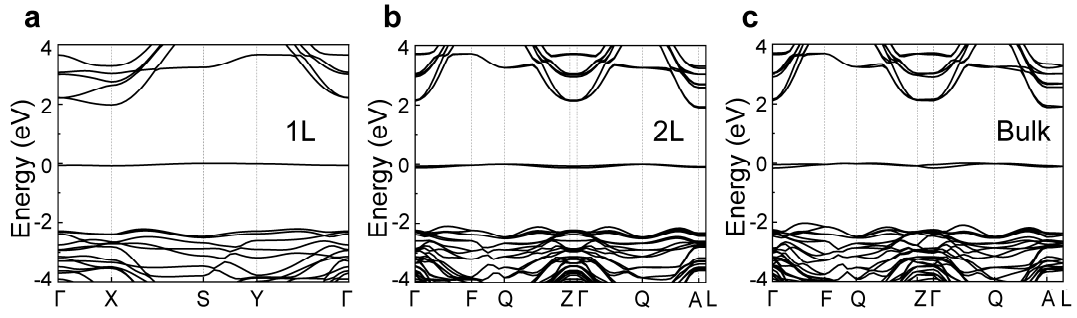

**Supplementary Fig. 2 | Band structures for NbOCl<sub>2</sub> with different layer thicknesses.** **a-c** HSE-calculated band structures for monolayer NbOCl<sub>2</sub>, bilayer NbOCl<sub>2</sub> and bulk NbOCl<sub>2</sub>, which have the indirect bandgaps of  $\sim 1.98$  eV,  $\sim 1.91$  eV and  $\sim 1.88$  eV, respectively. Similar bandgaps indicate the weak interlayer coupling in NbOCl<sub>2</sub>. Fermi level is set to zero.

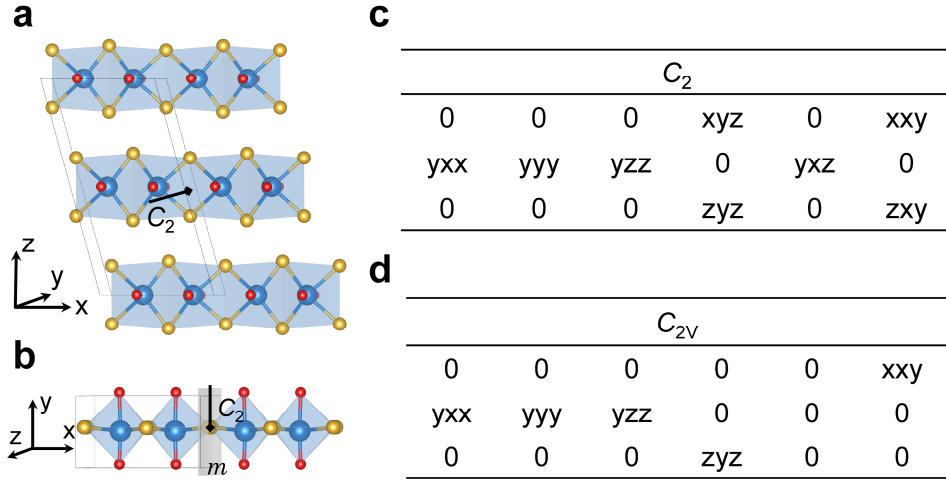

**Supplementary Fig. 3 | Symmetry selection rules for bulk and monolayer NbOCl<sub>2</sub>.** **a, b** Crystal structures of bulk and monolayer NbOCl<sub>2</sub>, respectively. Here,  $x, y, z$  represents the cartesian axes. Here,  $C_2$  implies 2-fold rotation operation and  $m$  is mirror plane. **c, d** The SHG susceptibility tensor  $\chi^{(2)}(2\omega; \omega, \omega)$  of monoclinic  $C_2$  point group and orthorhombic  $C_{2v}$  point group.

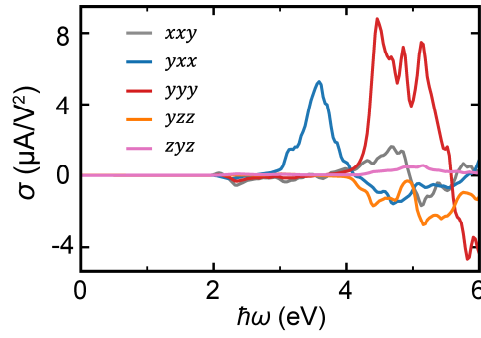

**Supplementary Fig. 4 | Five independent shift current susceptibility components in monolayer NbOCl<sub>2</sub>.**

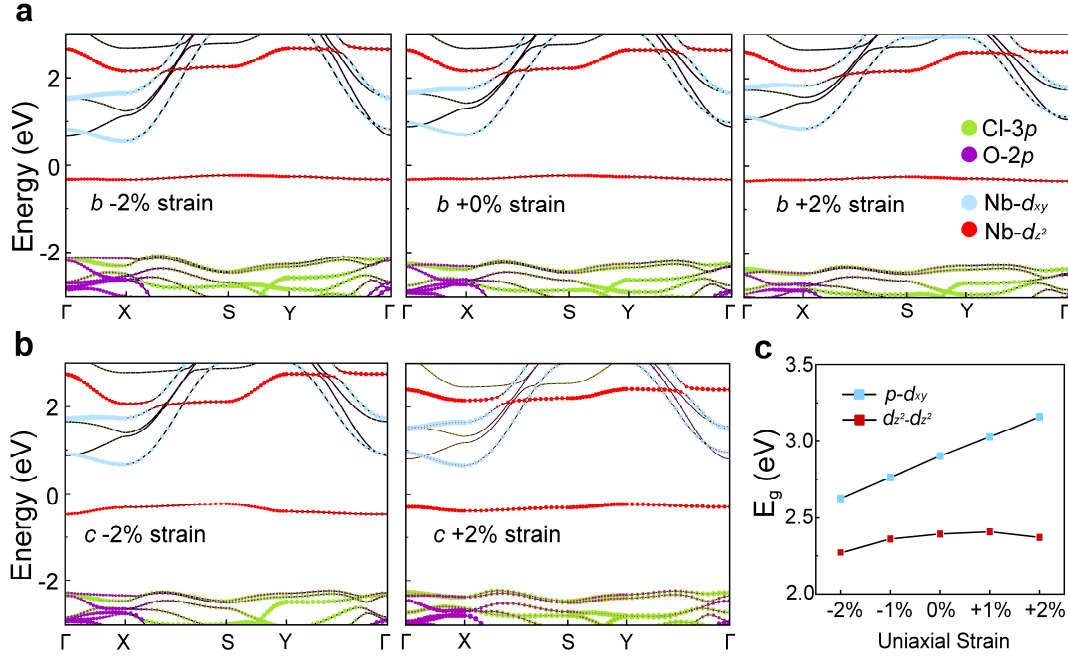

**Supplementary Fig. 5 | Band structures for monolayer NbOCl<sub>2</sub> under different uniaxial strains.**

**a** Orbital-projected band structures via applying -2%, 0, and 2% uniaxial strain along *b* direction. **b** Band structures via applying -2% and 2% uniaxial strain along *c* direction. Fermi level is set to zero. **c** Energy bandgap as a function of uniaxial strain. Here, blue dots represent the energy gap between Cl *p* orbital and Nb *d<sub>xy</sub>* orbital under the strain along *b* direction, and red dots represent the energy gap between two flat Nb *d<sub>z2</sub>* orbitals under the strain along *c* direction.

The strain along *b* direction mainly changes the length of Nb-O bond and further influences the energy level repulsion between conduction band contributed by Nb atoms and valance bands contributed by anion. Differently, the strain along *c* direction changes the strength of Peierls distortion and only changes the dispersion of Nb *d<sub>z2</sub>* orbitals. Therefore, as shown in **c**, the energy gap between two Nb *d<sub>z2</sub>* states is insensitive to the in-plane strain. However, the energy gap between *p* and *d* states increases when the strain along *b* direction changes from -2 % to 2 %.

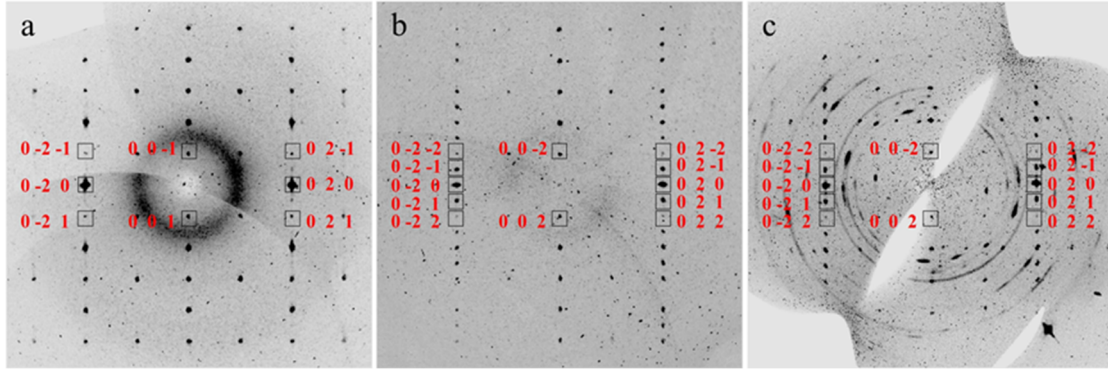

**Supplementary Fig. 6 | The  $(0, k, l)$  reflections of  $\text{NbOCl}_2$  obtained by single crystal X-ray diffraction. **a** Diffraction patterns collected at ambient condition. **b** Diffraction patterns collected at 500 K. **c** Diffraction patterns collected at 500 K.**

Bragg diffraction patterns in  $(0, k, l)$  are marked by their corresponding indices. Under high temperature or pressure, additional reflections along the  $(0, \pm 2, l)$  lines appear (Supplementary Fig. 6b and 6c), *i.e.*, the miller indices  $(0, k, l)$  regarded to the structure at ambient condition is transformed to  $(0, k, 2l)$  under high temperature or pressure. Thus, the unit cell will be doubled along  $c$  axis when increasing temperature or applying pressure, which is consistent with the unique AFE phase reported here because the  $\uparrow\uparrow\downarrow\downarrow$  polarization arrangement just requires the doubled unit cell along  $c$  axis of the FE phase.

The detailed structural information can be obtained by fitting results on the original diffraction pattern (see Method section in the main text). At the ambient condition, we list two possible unit cells with different  $Z$  values which are defined as numbers of formulas per unit cell (Supplementary Table 1).  $\text{NbOCl}_2$  prefers the structure with  $Z=4$  instead of  $Z=8$  ( $Z=4$ :  $R=0.034$ ,  $wR=0.077$ ;  $Z=8$ :  $R=0.057$ ,  $wR=0.109$ ) after performing the structural refinements, with weak reflections caused by structural distortion, which is consistent with the structure reported in previous literature [1,2]. Under high temperature or high pressure, however, the extra reflections suggest the doubled  $Z$  value of the crystal structures, implying the structural phase transitions of  $\text{NbOCl}_2$ . As shown in Supplementary Tables 2 and 17, the fitting results after performing the structural refinements show that the structures under high temperature (500 K,  $R=0.078$ ,  $wR=0.160$ ) or pressure (5.7 GPa,  $R=0.089$ ,  $wR=0.227$ ) prefer  $Z=8$ .

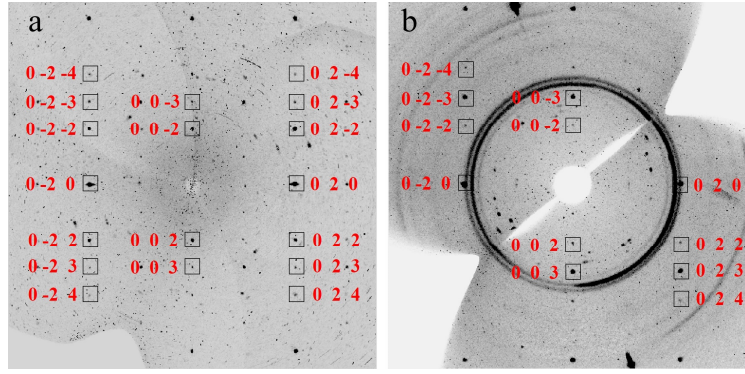

**Supplementary Fig. 7 | The  $(0, k, l)$  reflections of NbOI<sub>2</sub> obtained by single crystal X-ray diffraction. **a** Diffraction patterns collected at ambient condition. **b** Diffraction patterns collected at 10.7 GPa.**

NbOI<sub>2</sub> share the same symmetry at ambient condition like NbOCl<sub>2</sub>, but some weak reflections, e.g.  $(0, \pm 2, \pm 1)$ , are barely seen in Supplementary Fig. 7a. Some important structural information caused by the inconspicuous changes in diffraction patterns, e.g., the changes of the reflection intensity of  $(0, 0, 3)$ , can only be refined by fitting results on the original diffraction pattern. The fitting results under 10.7 GPa (Supplementary Tables 7 and 12) support a change from a non-centrosymmetric structure with  $C2$  space group to a centrosymmetric structure with  $C2/m$  space group, which is also consistent with the SHG measurements (see Fig. 4e in main text).

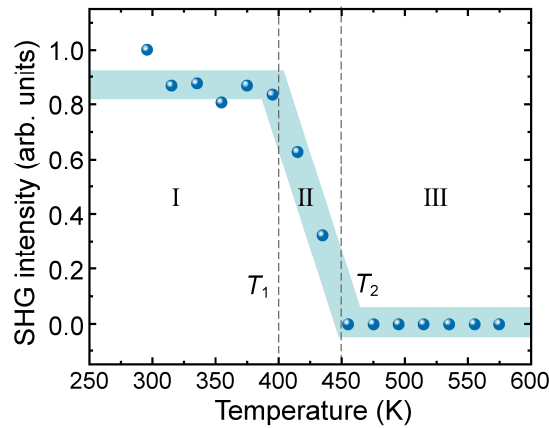

**Supplementary Fig. 8 | Normalized SHG intensity of single-crystal NbOCl<sub>2</sub> as a function of temperature.** The SHG intensity also undergoes three similar stages like under pressure, i.e., from FE phase (stage I) to FE-AFE mixing phase (stage II) and to AFE phase (stage III). The normalized SHG intensity starts to decrease at  $T_1 \sim 400$  K and eventually reaches zero at  $T_2 \sim 450$  K.

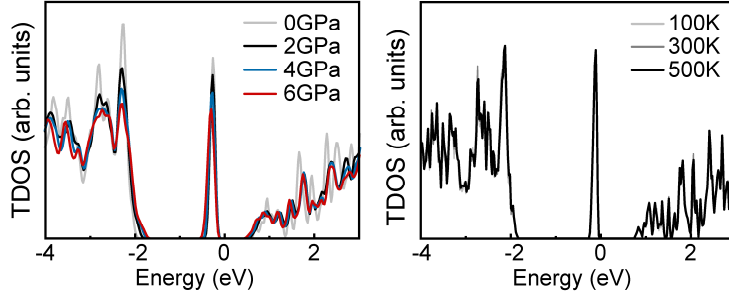

**Supplementary Fig. 9 | Total density of states (TDOS) of the bulk NbOCl<sub>2</sub> under different pressures (*left panel*) and temperatures (*right panel*).** The change of crystal lattice caused by pressure and temperature brings about similar TDOS with moving band edge slightly, implying that SHG spectra will change continuously or regularly under pressure and temperature. However, in the SHG measurement, the response keeps an average level under low pressure and diminish dramatically to zero over a certain pressure as shown in Fig. 4d. Hence, the speculation, SHG intensity diminish dramatically due to the shift of the edge for different temperature or pressure, could be ruled out.

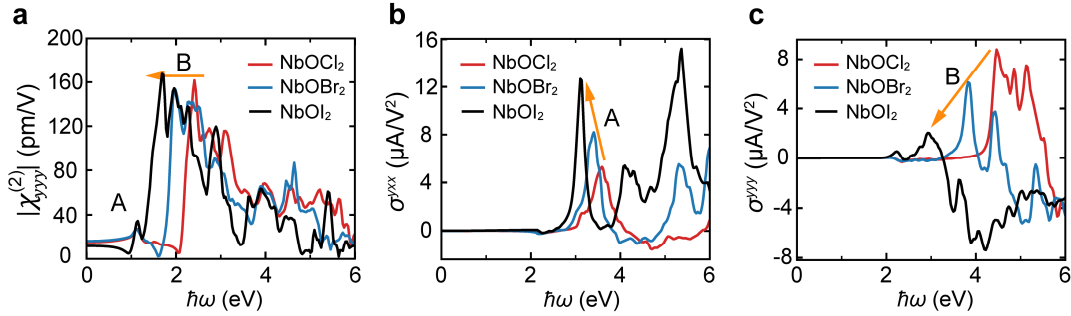

**Supplementary Fig. 10 | Nonlinear optical responses for monolayer NbOX<sub>2</sub> (X = Cl, Br, I).** **a** Calculated SHG susceptibility  $|\chi_{yyy}^{(2)}|$  as a function of incident photon energy. **b-c** Frequency-dependent shift current susceptibility tensors  $\sigma^{yxx}$  and  $\sigma^{yyy}$ . For NbOX<sub>2</sub>, SHG strengths for peak B are less changed for different X. However, the peaks of  $\sigma$  show different changes for different susceptibility tensor components with varying X from Cl to I.

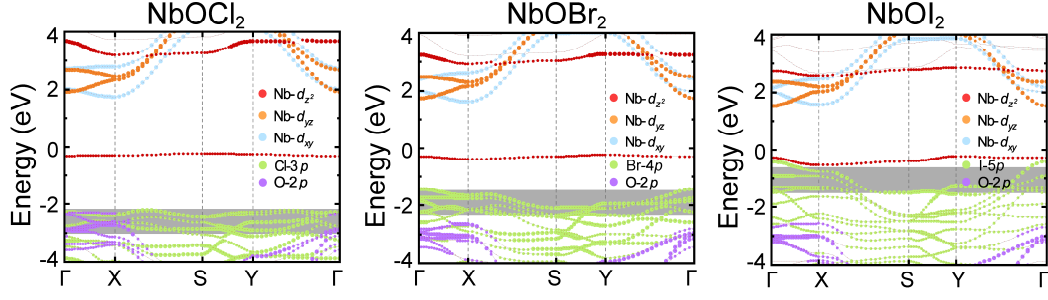

**Supplementary Fig. 11 | Band structures with scissor operators for NbOX<sub>2</sub> (X = Cl, Br, I).**

Fermi level is set to zero. The grey shadows show the orbitals which contribute the SHG peaks of three materials. The double-photons resonance in NbOI<sub>2</sub> and NbOBr<sub>2</sub> comes from  $Xp \rightarrow Nb d$ , while O  $p$  orbitals also contribute in NbOCl<sub>2</sub> ( $Xp + O p \rightarrow Nb d$ ).

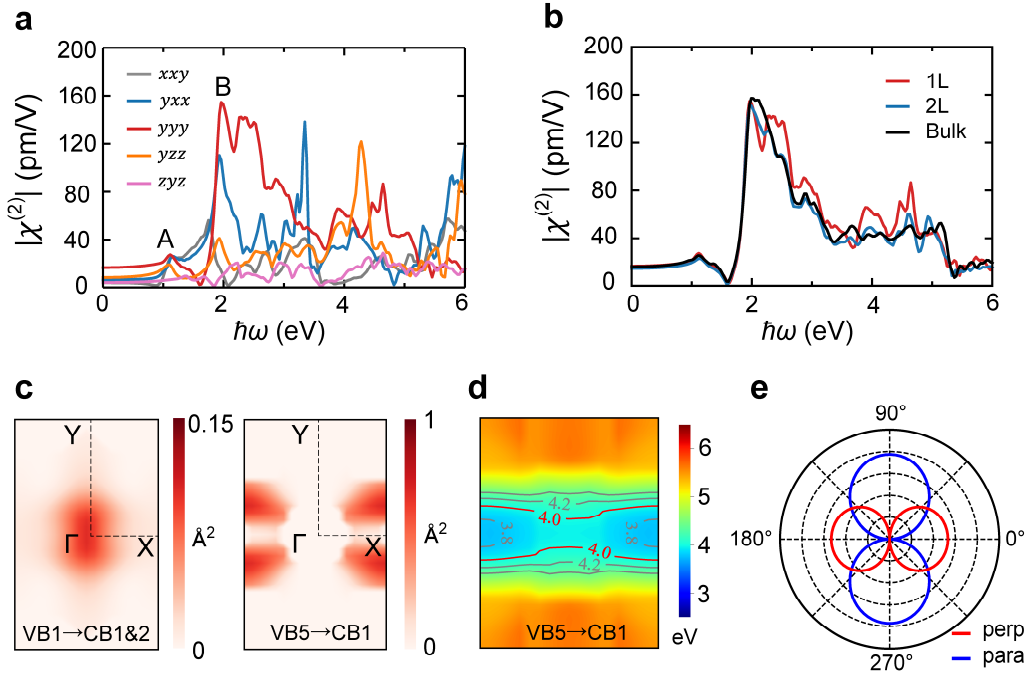

**Supplementary Fig. 12 | SHG Responses in NbOBr<sub>2</sub>.** **a** Calculated nonlinear susceptibility  $|\chi_{abc}^{(2)}|$  of monolayer NbOBr<sub>2</sub> as a function of incident photon energy. **b** SHG response for monolayer, bilayer, and bulk NbOBr<sub>2</sub>. **c**  $k$ -resolved absorption strength,  $r_{mn}^y r_{nm}^y$  (Å<sup>2</sup>), occurred near A and B peaks in SHG spectrum. Here, VB<sub>*n*</sub> (CB<sub>*n*</sub>) labels the *n*<sup>th</sup> valance (conduction) band starting from the top valance (bottom conduction) band. **d** Contour plot of energy difference of specified two bands. **e** Angle-resolved SHG polarization. Here, the photon energy of the incident light is set to be 1.96 eV, and the red (blue) curve represents the response with the direction perpendicular (parallel) to the polarization of incident light.



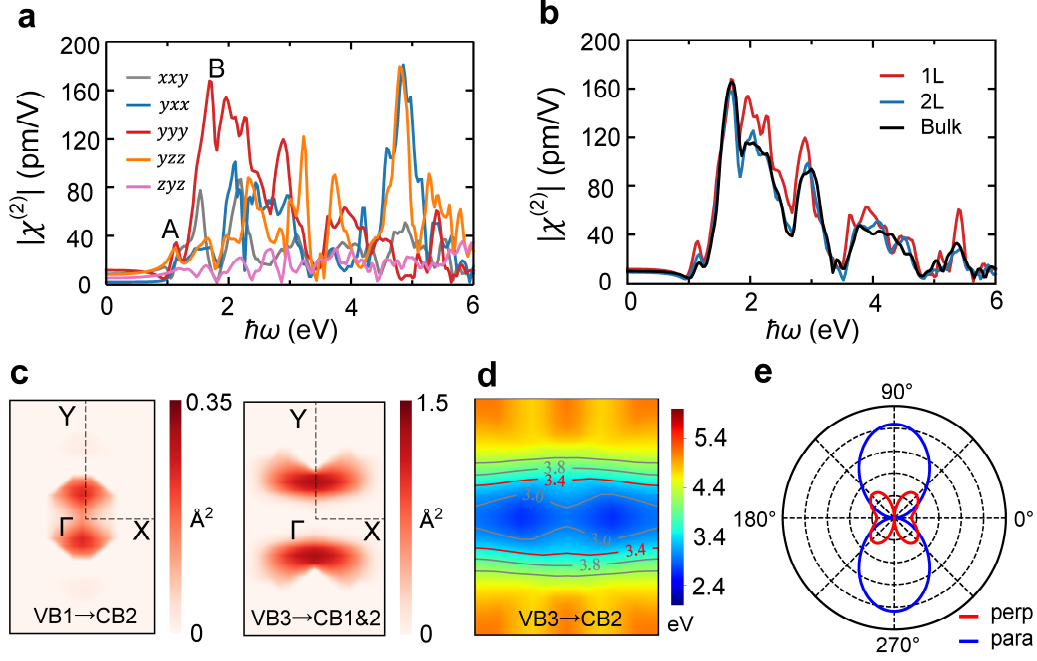

**Supplementary Fig. 13 | SHG Responses in NbOI<sub>2</sub>.** **a** Calculated nonlinear susceptibility  $|\chi_{abc}^{(2)}|$  of monolayer NbOI<sub>2</sub> as a function of incident photon energy. **b** SHG response for monolayer, bilayer, and bulk NbOI<sub>2</sub>. **c**  $k$ -resolved absorption strength,  $r_{mn}^y r_{nm}^y$  (Å<sup>2</sup>), occurred near A and B peaks in SHG spectrum. Here, VB<sub>*n*</sub> (CB<sub>*n*</sub>) labels the *n*<sup>th</sup> valance (conduction) band starting from the top valance (bottom conduction) band. **d** Contour plot of energy difference of specified two bands. **e** Angle-resolved SHG polarization. Here, the photon energy of the incident light is set to be 1.69 eV, and the red (blue) curve represents the response with the direction perpendicular (parallel) to the polarization of incident light.

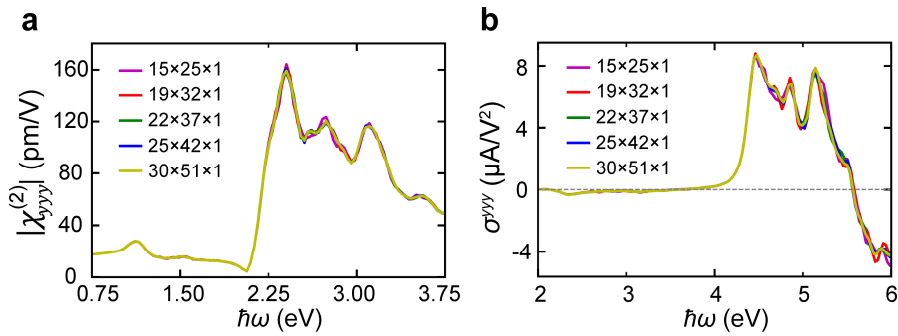

**Supplementary Fig. 14 | Convergence tests on the density of  $k$ -grid for NLO responses.** **a** Convergence test for the SHG susceptibility  $|\chi_{yyy}^{(2)}|$  of monolayer NbOI<sub>2</sub>. **b** Convergence test for the shift current susceptibility  $\sigma_{yyy}$  of monolayer NbOI<sub>2</sub>.

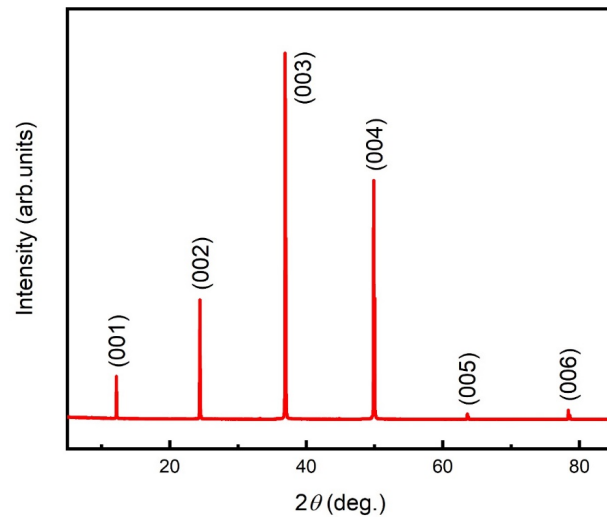

**Supplementary Fig. 15 | XRD of the synthesized single crystal NbOI<sub>2</sub>.**

### Supplementary Note 1. Symmetry selection rules in bulk and monolayer NbOCl<sub>2</sub>.

Monoclinic  $C_2$  symmetry and orthorhombic  $C_{2v}$  symmetry have partially uniform symmetry selection rules due to the double rotational symmetry. To see this point clearly, we plot the crystal structures of bulk NbOCl<sub>2</sub> and monolayer NbOCl<sub>2</sub> in Supplementary Fig. 3, where the corresponding coordinate systems are displayed. The second-order susceptibility tensor  $\chi_{abc}^{(2)}$  ( $a, b, c$  represents cartesian coordinates) has 27 components. The spatial symmetry causes  $\chi_{abc}^{(2)} = T_{aa'}T_{bb'}T_{cc'}\chi_{a'b'c'}^{(2)}$ , where  $T$  is transformation matrix, and the right side of above equation satisfies the Einstein's summation rule. For the monoclinic  $C_2$  symmetry, there is a double rotational symmetry about  $y$  axis whose transformation matrix can be expressed as

$$T = \begin{pmatrix} -1 & 0 & 0 \\ 0 & 1 & 0 \\ 0 & 0 & -1 \end{pmatrix}.$$

When the left side of above equation walk through all elements, we can list 27 equations. Considering intrinsic permutation symmetry, there is a non-zero component distribution of  $3 \times 6$  matrix shown in Supplementary Fig. 3c. On the other hand, for the orthorhombic  $C_{2v}$  symmetry, there is an additional mirror symmetry about the  $yOz$  plane which satisfies

$$T = \begin{pmatrix} -1 & 0 & 0 \\ 0 & 1 & 0 \\ 0 & 0 & 1 \end{pmatrix},$$

which eliminates three components:  $xyz$ ,  $yxz$ , and  $zxy$ , resulting in the  $3 \times 6$  matrix shown in Supplementary Fig. 3d. Comparing Supplementary Fig. 3c and Supplementary Fig. 3d, it can be found that some non-zero components of the second-order susceptibility tensor are all surviving.

Due to the extremely weak interlayer interaction of NbOCl<sub>2</sub>, stacking multiple layers have similar optical response as monolayer (see Fig. 2f in the main text). Therefore, the SHG simulations performed on monolayer NbOCl<sub>2</sub> are comparable to monoclinic bulk NbOCl<sub>2</sub>.

**Supplementary Note 2. Expand of the generalized derivative of the dipole matrix element by using sum rule.**

The generalized derivative of the dipole matrix element was expressed as in geometric form,

$$r_{nm;b}^a(\mathbf{k}) \equiv \frac{\partial r_{nm}^a(\mathbf{k})}{\partial k^b} - i[\xi_{nm}^b(\mathbf{k}) - \xi_{mm}^b(\mathbf{k})]r_{nm}^a(\mathbf{k}). \quad (1)$$

Here,  $a, b$  indicate Cartesian components,  $\xi_{nm}^a = i \int d\mathbf{x} u_n^*(\mathbf{k}, \mathbf{x}) \frac{\partial}{\partial k^a} u_m(\mathbf{k}, \mathbf{x})$ , which is called Berry connection when  $n = m$ , and  $r_{nm}^a(\mathbf{k}) \equiv \xi_{nm}^a(\mathbf{k})$  ( $n \neq m$ ) is non-Abelian Berry connection. Equation (1) could be expanded in detail by using the commutation relation  $[r^a, p^b] = i\hbar\delta^{ab}$ . We start from the commutation with Bloch states  $|n\mathbf{k}\rangle$  labeled by a band index  $n$  and crystal momentum  $\mathbf{k}$ ,

$$\begin{aligned} \langle n\mathbf{k} | [r^a, p^b] | m\mathbf{k}' \rangle &= \langle n\mathbf{k} | [r_i^a, p^b] | m\mathbf{k}' \rangle + \langle n\mathbf{k} | [r_e^a, p^b] | m\mathbf{k}' \rangle \\ &= i\hbar\delta^{ab}\delta_{nm}\delta(\mathbf{k} - \mathbf{k}'). \end{aligned} \quad (2)$$

When  $n \neq m$ , the intraband part can be expressed as

$$\begin{aligned} \langle n\mathbf{k} | [r_i^a, p^b] | m\mathbf{k}' \rangle &= i\delta(\mathbf{k} - \mathbf{k}') (p_{nm}^b)_{;k^a} = i\delta(\mathbf{k} - \mathbf{k}') (im\omega_{nm}r_{nm}^b)_{;k^a} \\ &= -m\delta(\mathbf{k} - \mathbf{k}') \omega_{nm} (r_{nm}^b)_{;k^a} - m\delta(\mathbf{k} - \mathbf{k}') r_{nm}^b \Delta_{nm}^a, \end{aligned} \quad (3)$$

which use a relation involving intraband position operator  $\mathbf{r}_i$  and simple operator  $\mathbf{S}$ ,

$$\langle n\mathbf{k} | [\mathbf{r}_i, \mathbf{S}] | m\mathbf{k}' \rangle = i\delta(\mathbf{k} - \mathbf{k}') (\mathbf{S}_{nm})_{;k}, (\mathbf{S}_{nm})_{;k} \equiv \frac{\partial \mathbf{S}_{nm}}{\partial \mathbf{k}} - i\mathbf{S}_{nm}(\xi_{nn} - \xi_{mm}).$$

The simple operator  $\mathbf{S}$  is defined as one whose Bloch state matrix elements involve only  $\delta(\mathbf{k} - \mathbf{k}')$ ,

$$\text{i.e., } \langle n\mathbf{k} | \mathbf{S} | m\mathbf{k}' \rangle = \delta(\mathbf{k} - \mathbf{k}') \mathbf{S}_{nm}.$$

The interband part can be expanded by inserting normalized complete basis,

$$\begin{aligned} \langle n\mathbf{k} | [r_e^a, p^b] | m\mathbf{k}' \rangle &= \sum_{l, \mathbf{k}_t} \langle n\mathbf{k} | r_e^a | l\mathbf{k}_t \rangle \langle l\mathbf{k}_t | p^b | m\mathbf{k}' \rangle - \langle n\mathbf{k} | p^b | l\mathbf{k}_t \rangle \langle l\mathbf{k}_t | r_e^a | m\mathbf{k}' \rangle \\ &= \sum_{l, \mathbf{k}_t} (1 - \delta_{nl}) \delta(\mathbf{k} - \mathbf{k}_t) \xi_{nl}^a \cdot p_{lm}^b \delta(\mathbf{k}_t - \mathbf{k}') \\ &\quad - \sum_{l, \mathbf{k}_t} p_{nl}^b \delta(\mathbf{k} - \mathbf{k}_t) \cdot (1 - \delta_{lm}) \delta(\mathbf{k}_t - \mathbf{k}') \xi_{lm}^a \\ &= \sum_{l, l \neq m \neq n} \delta(\mathbf{k} - \mathbf{k}') (\xi_{nl}^a \cdot p_{lm}^b - \xi_{lm}^a \cdot p_{nl}^b) \\ &\quad + \delta(\mathbf{k} - \mathbf{k}') (\xi_{nm}^a \cdot p_{mm}^b - \xi_{nm}^a \cdot p_{nn}^b) \\ &= m\delta(\mathbf{k} - \mathbf{k}') \left( r_{nm}^a \Delta_{mn}^b + i \sum_{l, l \neq m \neq n} (\omega_{lm} r_{nl}^a r_{lm}^b - \omega_{nl} r_{lm}^a r_{nl}^b) \right). \end{aligned} \quad (4)$$

Here,  $\mathbf{p}_{nm} = im\mathbf{r}_{nm}\omega_{nm}$ ,  $\omega_{nm}$  is the energy difference of the  $n^{\text{th}}$  band and  $m^{\text{th}}$  band. By using equation (1):  $\langle n\mathbf{k} | [r_i^a, p^b] | m\mathbf{k}' \rangle + \langle n\mathbf{k} | [r_e^a, p^b] | m\mathbf{k}' \rangle = 0$  again, we can obtain

$$\begin{aligned}
& m\delta(\mathbf{k}-\mathbf{k}')\omega_{nm}(r_{nm}^b)_{;k^a} - m\delta(\mathbf{k}-\mathbf{k}')r_{nm}^b\Delta_{mn}^a \\
& = m\delta(\mathbf{k}-\mathbf{k}')\left(r_{nm}^a\Delta_{mn}^b + i\sum_{l,l\neq m\neq n}(\omega_{lm}r_{nl}^ar_{lm}^b - \omega_{nl}r_{lm}^ar_{nl}^b)\right). \tag{5}
\end{aligned}$$

By sorting it, the expansion of the generalized derivative of matrix elements shows as

$$(r_{nm}^b)_{;k^a} = \frac{r_{nm}^a\Delta_{mn}^b + r_{nm}^b\Delta_{mn}^a}{\omega_{nm}} + \frac{i}{\omega_{nm}}\sum_l(\omega_{lm}r_{nl}^ar_{lm}^b - \omega_{nl}r_{lm}^ar_{nl}^b), \tag{6}$$

which is interpreted as a “sum rule”. Here,  $\Delta_{mn} = \frac{p_{mm}-p_{nn}}{m} = \frac{\partial\omega_{mn}}{\partial\mathbf{k}}$ , represents the difference of group velocity of electrons.

**Supplementary Table 1. Experimental crystallographic data for NbOCl<sub>2</sub> at ambient conditions obtained by single-crystal X-ray diffraction.**

|                                                             | NbOCl <sub>2</sub> , Z=4                                               | NbOCl <sub>2</sub> , Z=8                                                |
|-------------------------------------------------------------|------------------------------------------------------------------------|-------------------------------------------------------------------------|
| Chemical formula                                            | NbOCl <sub>2</sub>                                                     | NbOCl <sub>2</sub>                                                      |
| $M_r$                                                       | 179.81                                                                 | 179.81                                                                  |
| Crystal system, space group                                 | Monoclinic, C2                                                         | Monoclinic, C2                                                          |
| $a, b, c$ (Å)                                               | 12.8412(15), 3.9025(4),<br>6.7148(9)                                   | 12.8452(17), 3.9028(4),<br>13.4311(19)                                  |
| $\alpha, \beta, \gamma$ (°)                                 | 90, 105.830(5), 90                                                     | 90, 105.846(5), 90                                                      |
| $V$ (Å <sup>3</sup> )                                       | 323.74(7)                                                              | 647.74(14)                                                              |
| $Z$                                                         | 4                                                                      | 8                                                                       |
| Density (Mg/m <sup>3</sup> )                                | 3.689                                                                  | 3.688                                                                   |
| Wavelength (Å)                                              | 0.71073                                                                | 0.71073                                                                 |
| $\mu$ (mm <sup>-1</sup> )                                   | 5.089                                                                  | 5.087                                                                   |
| Absorption correction                                       | Multi-scan                                                             | Multi-scan                                                              |
| $T_{\min}, T_{\max}$                                        | 0.62, 0.85                                                             | 0.60, 0.85                                                              |
| No. of measured, independent and observed reflections       | 575, 575, 544                                                          | 1028, 1028, 677                                                         |
| $R_{\text{int}}$                                            | 0.036                                                                  | 0.104                                                                   |
| $\theta_{\max}$ (°)                                         | 31.00                                                                  | 29.57                                                                   |
| Refinement on                                               | $F^2$                                                                  | $F^2$                                                                   |
| $R[F^2 > 2\sigma(F^2)], wR(F^2), S$                         | 0.034, 0.77, 1.10                                                      | 0.057, 0.109, 1.16                                                      |
| Data / restraints / parameters                              | 575/ 1/ 37                                                             | 1028/ 1/ 73                                                             |
| Weighting scheme                                            | $w=1/[\sigma^2(F_o^2)+(0.021P)^2+6.255P]$ , where $P=(F_o^2+2F_c^2)/3$ | $w=1/[\sigma^2(F_o^2)+(0.036P)^2+25.272P]$ , where $P=(F_o^2+2F_c^2)/3$ |
| $\Delta\rho_{\max}, \Delta\rho_{\min}$ (e Å <sup>-3</sup> ) | 2.22, -1.66                                                            | 3.33, -3.08                                                             |

**Supplementary Table 2. Experimental structure refinement of NbOCl<sub>2</sub> at 5.7 GPa.**

|                                     |                                                                                               |
|-------------------------------------|-----------------------------------------------------------------------------------------------|
| Empirical formula                   | NbOCl <sub>2</sub>                                                                            |
| Formula weight                      | 179.81                                                                                        |
| Temperature                         | 296 K                                                                                         |
| Wavelength                          | 0.71073 Å                                                                                     |
| Crystal system                      | Monoclinic                                                                                    |
| Space group                         | C2/c                                                                                          |
| Unit cell dimensions                | a = 11.699(7) Å, α = 90.00°<br>b = 3.8277(6) Å, β = 106.83(3)°<br>c = 13.157(3) Å, γ = 90.00° |
| Volume                              | 563.3(4) Å <sup>3</sup>                                                                       |
| Z                                   | 8                                                                                             |
| Density (calculated)                | 4.236 g/cm <sup>3</sup>                                                                       |
| Absorption coefficient              | 5.84 mm <sup>-1</sup>                                                                         |
| F(000)                              | 664                                                                                           |
| Crystal size                        | 0.035 x 0.034 x 0.023 mm <sup>3</sup>                                                         |
| θ range for data collection         | 3.2 to 25.3°                                                                                  |
| Index ranges                        | -6 ≤ h ≤ 6, -4 ≤ k ≤ 4, -14 ≤ l ≤ 14                                                          |
| Reflections collected               | 749                                                                                           |
| Independent reflections             | 147 [R(int) = 0.042]                                                                          |
| Coverage of independent reflections | 28.4%                                                                                         |
| Refinement method                   | Full-matrix least-squares on F <sup>2</sup>                                                   |
| Data / restraints / parameters      | 147 / 24 / 37                                                                                 |
| Goodness-of-fit                     | 1.24                                                                                          |
| Final R indices [≥2σ(I)]            | R <sub>obs</sub> = 0.089, wR <sub>obs</sub> = 0.227                                           |
| R indices [all data]                | R <sub>all</sub> = 0.096, wR <sub>all</sub> = 0.242                                           |
| Largest diff. peak and hole         | 1.69 and -1.24 e·Å <sup>-3</sup>                                                              |

$R = \Sigma ||F_o| - |F_c|| / \Sigma |F_o|$ ,  $wR = \{ \Sigma [w(|F_o|^2 - |F_c|^2)^2] / \Sigma [w(|F_o|^4)] \}^{1/2}$  and calc

$w = 1/[\sigma^2(F_o^2) + (0.0503P)^2 + 0.0000P]$  where  $P = (F_o^2 + 2F_c^2)/3$

**Supplementary Table 3. Experimental atomic coordinates and equivalent isotropic atomic displacement parameters (Å<sup>2</sup>) of NbOCl<sub>2</sub> at 5.7 GPa.**

| Label | x          | y          | z           | Occupancy | U <sub>eq</sub> <sup>*</sup> |
|-------|------------|------------|-------------|-----------|------------------------------|
| Nb1   | 0.5003 (6) | 0.9513 (7) | 0.6381 (3)  | 1         | 0.026 (4)                    |
| O1    | 0.498 (5)  | 0.486 (6)  | 0.6348 (17) | 1         | 0.024 (7)                    |
| Cl1   | 0.677 (3)  | 0.994 (2)  | 0.7971 (9)  | 1         | 0.037 (5)                    |
| Cl2   | 0.345 (2)  | 0.001 (2)  | 0.4610 (8)  | 1         | 0.032 (5)                    |

\*U<sub>eq</sub> is defined as one third of the trace of the orthogonalized U<sub>ij</sub> tensor.

**Supplementary Table 4. Experimental anisotropic atomic displacement parameters ( $\text{\AA}^2$ ) of NbOCl<sub>2</sub> at 5.7 GPa.**

| Label | U <sub>11</sub> | U <sub>22</sub> | U <sub>33</sub> | U <sub>12</sub> | U <sub>13</sub> | U <sub>23</sub> |
|-------|-----------------|-----------------|-----------------|-----------------|-----------------|-----------------|
| Nb1   | 0.048 (12)      | 0.010 (2)       | 0.026 (4)       | 0.0001 (16)     | 0.019 (6)       | -0.0037 (9)     |
| O1    | 0.026 (15)      | 0.017 (7)       | 0.028 (10)      | 0.004 (9)       | 0.005 (10)      | -0.001 (5)      |
| Cl1   | 0.040 (13)      | 0.060 (4)       | 0.012 (7)       | -0.007 (7)      | 0.008 (8)       | 0.000 (3)       |
| Cl2   | 0.036 (14)      | 0.053 (4)       | 0.005 (6)       | -0.007 (6)      | 0.003 (8)       | -0.005 (3)      |

The anisotropic displacement factor exponent takes the form:  $-2\pi^2[h^2a^{*2}U_{11} + \dots + 2hkb^*c^*U_{23}]$ .

**Supplementary Table 5. Experimental bond lengths ( $\text{\AA}$ ) of NbOCl<sub>2</sub> at 5.7 GPa.**

| Label                 | Distances | Label                  | Distances  |
|-----------------------|-----------|------------------------|------------|
| Nb1—O1                | 1.78 (2)  | Nb1—Cl2                | 2.515 (18) |
| Nb1—O1 <sup>i</sup>   | 2.05 (2)  | Nb1—Cl2 <sup>iii</sup> | 2.53 (2)   |
| Nb1—Cl1 <sup>ii</sup> | 2.47 (3)  | Nb1—Nb1 <sup>ii</sup>  | 2.947 (6)  |
| Nb1—Cl1               | 2.48 (3)  |                        |            |

Symmetry codes: (i)  $x, y-1, z$ ; (ii)  $-x+1, y, -z+3/2$ ; (iii)  $-x+1, -y, -z+1$ ; (iv)  $x, y+1, z$ .

**Supplementary Table 6. Experimental bond angles ( $^\circ$ ) of NbOCl<sub>2</sub> at 5.7 GPa.**

| Label                                   | Angles     | Label                                     | Angles    |
|-----------------------------------------|------------|-------------------------------------------|-----------|
| O1—Nb1—O1 <sup>i</sup>                  | 175 (3)    | Cl1 <sup>ii</sup> —Nb1—Cl2 <sup>iii</sup> | 167.0 (7) |
| O1—Nb1—Cl1 <sup>ii</sup>                | 92.8 (17)  | Cl1—Nb1—Cl2 <sup>iii</sup>                | 84.3 (12) |
| O1 <sup>i</sup> —Nb1—Cl1 <sup>ii</sup>  | 85.7 (14)  | Cl2—Nb1—Cl2 <sup>iii</sup>                | 86.4 (12) |
| O1—Nb1—Cl1                              | 96.2 (16)  | O1—Nb1—Nb1 <sup>ii</sup>                  | 91.6 (9)  |
| O1 <sup>i</sup> —Nb1—Cl1                | 88.8 (15)  | O1 <sup>i</sup> —Nb1—Nb1 <sup>ii</sup>    | 91.4 (8)  |
| Cl1 <sup>ii</sup> —Nb1—Cl1              | 105.3 (13) | Cl1 <sup>ii</sup> —Nb1—Nb1 <sup>ii</sup>  | 53.0 (7)  |
| O1—Nb1—Cl2                              | 91.1 (15)  | Cl1—Nb1—Nb1 <sup>ii</sup>                 | 52.7 (7)  |
| O1 <sup>i</sup> —Nb1—Cl2                | 84.0 (14)  | Cl2—Nb1—Nb1 <sup>ii</sup>                 | 136.0 (7) |
| Cl1 <sup>ii</sup> —Nb1—Cl2              | 83.0 (11)  | Cl2 <sup>iii</sup> —Nb1—Nb1 <sup>ii</sup> | 137.0 (9) |
| Cl1—Nb1—Cl2                             | 168.6 (6)  | Nb1 <sup>ii</sup> —Cl1—Nb1                | 74.3 (12) |
| O1—Nb1—Cl2 <sup>iii</sup>               | 94.9 (14)  | Nb1—Cl2—Nb1 <sup>iii</sup>                | 93.6 (12) |
| O1 <sup>i</sup> —Nb1—Cl2 <sup>iii</sup> | 85.7 (13)  | Nb1—O1—Nb1 <sup>iv</sup>                  | 175 (3)   |

Symmetry codes: (i)  $x, y-1, z$ ; (ii)  $-x+1, y, -z+3/2$ ; (iii)  $-x+1, -y, -z+1$ ; (iv)  $x, y+1, z$ .



**Supplementary Table 7. Experimental structure refinement of NbOI<sub>2</sub> at ambient condition.**

|                                     |                                                   |                 |  |
|-------------------------------------|---------------------------------------------------|-----------------|--|
| Empirical formula                   | NbOI <sub>2</sub>                                 |                 |  |
| Formula weight                      | 362.71                                            |                 |  |
| Temperature                         | 296(2) K                                          |                 |  |
| Wavelength                          | 0.71073 Å                                         |                 |  |
| Crystal system                      | Monoclinic                                        |                 |  |
| Space group                         | C2                                                |                 |  |
| Unit cell dimensions                | a = 15.113(3) Å                                   | α = 90°         |  |
|                                     | b = 3.9389(8) Å                                   | β = 103.845(5)° |  |
|                                     | c = 7.5284(16) Å                                  | γ = 90°         |  |
| Volume                              | 435.13(16) Å <sup>3</sup>                         |                 |  |
| Z                                   | 4                                                 |                 |  |
| Density (calculated)                | 5.537 Mg/m <sup>3</sup>                           |                 |  |
| Absorption coefficient              | 16.751 mm <sup>-1</sup>                           |                 |  |
| F(000)                              | 620                                               |                 |  |
| Crystal size                        | 0.040 x 0.035 x 0.032 mm <sup>3</sup>             |                 |  |
| θ range for data collection         | 2.78 to 25.66°                                    |                 |  |
| Index ranges                        | -18<=h<=18, -4<=k<=4, -9<=l<=9                    |                 |  |
| Reflections collected               | 1971                                              |                 |  |
| Independent reflections             | 797 [R(int) = 0.0358]                             |                 |  |
| Coverage of independent reflections | 98.8 %                                            |                 |  |
| Refinement method                   | Full-matrix least-squares on F <sup>2</sup>       |                 |  |
| Data / restraints / parameters      | 797 / 7 / 38                                      |                 |  |
| Goodness-of-fit                     | 1.094                                             |                 |  |
| Final R indices [>2σ(I)]            | R <sub>1</sub> = 0.0727, wR <sub>2</sub> = 0.1380 |                 |  |
| R indices [all data]                | R <sub>1</sub> = 0.0899, wR <sub>2</sub> = 0.1512 |                 |  |
| Largest diff. peak and hole         | 4.680 and -4.540 e·Å <sup>-3</sup>                |                 |  |

$R = \Sigma ||F_o| - |F_c|| / \Sigma |F_o|$ ,  $wR = \{\Sigma [w(|F_o|^2 - |F_c|^2)^2] / \Sigma [w(|F_o|^4)]\}^{1/2}$  and calc

$w = 1/[\sigma^2(F_o^2) + 146.4739P]$  where  $P = (F_o^2 + 2F_c^2)/3$

**Supplementary Table 8. Experimental atomic coordinates and equivalent isotropic atomic displacement parameters (Å<sup>2</sup>) of NbOI<sub>2</sub> at ambient condition.**

| Label | x          | y           | z          | Occupancy | Site | U <sub>eq</sub> * |
|-------|------------|-------------|------------|-----------|------|-------------------|
| I001  | 0.6499 (2) | 0.2350 (10) | 0.0713 (5) | 1         | 4c   | 0.0282 (8)        |
| I002  | 0.6335 (2) | 0.2326 (9)  | 0.5605 (5) | 1         | 4c   | 0.0286 (8)        |
| Nb03  | 0.5005 (3) | 0.2852 (8)  | 0.2215 (9) | 1         | 4c   | 0.0384 (14)       |
| O004  | 0.500 (2)  | 0.751 (11)  | 0.221 (4)  | 1         | 4c   | 0.037 (8)         |

\*U<sub>eq</sub> is defined as one third of the trace of the orthogonalized U<sub>ij</sub> tensor.

**Supplementary Table 9. Experimental anisotropic atomic displacement parameters ( $\text{\AA}^2$ ) of NbOI<sub>2</sub> at ambient condition.**

| Label | U <sub>11</sub> | U <sub>22</sub> | U <sub>33</sub> | U <sub>12</sub> | U <sub>13</sub> | U <sub>23</sub> |
|-------|-----------------|-----------------|-----------------|-----------------|-----------------|-----------------|
| I001  | 0.0483 (18)     | 0.0131 (14)     | 0.0274 (16)     | 0.001 (2)       | 0.0175 (15)     | −0.001 (2)      |
| I002  | 0.0534 (19)     | 0.0135 (15)     | 0.0176 (14)     | 0.003 (3)       | 0.0057 (15)     | −0.001 (2)      |
| Nb03  | 0.0193 (18)     | 0.007 (2)       | 0.086 (4)       | 0.003 (2)       | 0.007 (3)       | 0.004 (3)       |
| O004  | 0.027 (14)      | 0.023 (14)      | 0.06 (2)        | 0.01 (2)        | 0.002 (16)      | 0.01 (2)        |

The anisotropic displacement factor exponent takes the form:  $-2\pi^2[h^2a^{*2}U_{11} + \dots + 2hka^*b^*U_{12}]$ .

**Supplementary Table 10. Experimental bond lengths ( $\text{\AA}$ ) of NbOI<sub>2</sub> at ambient condition.**

| Label                   | Distances | Label                    | Distances  |
|-------------------------|-----------|--------------------------|------------|
| I001—Nb03               | 2.764 (6) | Nb03—O004                | 1.83 (5)   |
| I001—Nb03 <sup>i</sup>  | 2.769 (7) | Nb03—O004 <sup>iii</sup> | 2.11 (5)   |
| I002—Nb03               | 2.854 (7) | Nb03—Nb03 <sup>i</sup>   | 3.331 (14) |
| I002—Nb03 <sup>ii</sup> | 2.903 (7) |                          |            |

Symmetry codes: (i)  $-x+1, y, -z$ ; (ii)  $-x+1, y, -z+1$ ; (iii)  $x, y-1, z$ ; (iv)  $x, y+1, z$ .

**Supplementary Table 11. Experimental bond angles ( $^\circ$ ) of NbOI<sub>2</sub> at ambient condition.**

| Label                                       | Angles     | Label                                        | Angles     |
|---------------------------------------------|------------|----------------------------------------------|------------|
| Nb03—I001—Nb03 <sup>i</sup>                 | 74.0 (2)   | O004—Nb03—I002 <sup>ii</sup>                 | 93.8 (11)  |
| Nb03—I002—Nb03 <sup>ii</sup>                | 93.6 (2)   | O004 <sup>iii</sup> —Nb03—I002 <sup>ii</sup> | 85.7 (9)   |
| O004—Nb03—O004 <sup>iii</sup>               | 179.2 (19) | I001—Nb03—I002 <sup>ii</sup>                 | 167.1 (2)  |
| O004—Nb03—I001                              | 94.4 (11)  | I001 <sup>i</sup> —Nb03—I002 <sup>ii</sup>   | 83.93 (16) |
| O004 <sup>iii</sup> —Nb03—I001              | 86.2 (9)   | I002—Nb03—I002 <sup>ii</sup>                 | 85.8 (2)   |
| O004—Nb03—I001 <sup>i</sup>                 | 93.7 (10)  | O004—Nb03—Nb03 <sup>i</sup>                  | 90.0 (11)  |
| O004 <sup>iii</sup> —Nb03—I001 <sup>i</sup> | 85.6 (9)   | O004 <sup>iii</sup> —Nb03—Nb03 <sup>i</sup>  | 90.0 (9)   |
| I001—Nb03—I001 <sup>i</sup>                 | 105.4 (2)  | I001—Nb03—Nb03 <sup>i</sup>                  | 53.05 (17) |
| O004—Nb03—I002                              | 94.5 (10)  | I001 <sup>i</sup> —Nb03—Nb03 <sup>i</sup>    | 52.93 (19) |
| O004 <sup>iii</sup> —Nb03—I002              | 86.1 (9)   | I002—Nb03—Nb03 <sup>i</sup>                  | 136.8 (3)  |
| I001—Nb03—I002                              | 83.73 (16) | I002 <sup>ii</sup> —Nb03—Nb03 <sup>i</sup>   | 136.9 (3)  |
| I001 <sup>i</sup> —Nb03—I002                | 167.2 (2)  | Nb03—O004—Nb03 <sup>iv</sup>                 | 179.2 (19) |

Symmetry codes: (i)  $-x+1, y, -z$ ; (ii)  $-x+1, y, -z+1$ ; (iii)  $x, y-1, z$ ; (iv)  $x, y+1, z$ .

**Supplementary Table 12. Experimental structure refinement of NbOI<sub>2</sub> at 10.7 GPa.**

|                                     |                                                                                                                                                     |
|-------------------------------------|-----------------------------------------------------------------------------------------------------------------------------------------------------|
| Empirical formula                   | NbOI <sub>2</sub>                                                                                                                                   |
| Formula weight                      | 362.71                                                                                                                                              |
| Temperature                         | 296.15(10) K                                                                                                                                        |
| Wavelength                          | 0.56087 Å                                                                                                                                           |
| Crystal system                      | Monoclinic                                                                                                                                          |
| Space group                         | <i>C2/m</i>                                                                                                                                         |
| Unit cell dimensions                | $a = 13.27(7) \text{ Å}$ $\alpha = 90^\circ$<br>$b = 3.7721(11) \text{ Å}$ $\beta = 105.6(3)^\circ$<br>$c = 7.222(6) \text{ Å}$ $\gamma = 90^\circ$ |
| Volume                              | 348.1(19) Å <sup>3</sup>                                                                                                                            |
| Z                                   | 4                                                                                                                                                   |
| Density (calculated)                | 6.921 Mg/m <sup>3</sup>                                                                                                                             |
| Absorption coefficient              | 19.742 mm <sup>-1</sup>                                                                                                                             |
| F(000)                              | 620                                                                                                                                                 |
| Crystal size                        | 0.033 x 0.032 x 0.028 mm <sup>3</sup>                                                                                                               |
| $\theta$ range for data collection  | 2.310 to 21.204°                                                                                                                                    |
| Index ranges                        | -7 ≤ h ≤ 6, -4 ≤ k ≤ 4, -9 ≤ l ≤ 9                                                                                                                  |
| Reflections collected               | 570                                                                                                                                                 |
| Independent reflections             | 124 [R(int) = 0.0851]                                                                                                                               |
| Coverage of independent reflections | 29.8 %                                                                                                                                              |
| Refinement method                   | Full-matrix least-squares on F <sup>2</sup>                                                                                                         |
| Data / restraints / parameters      | 124 / 24 / 26                                                                                                                                       |
| Goodness-of-fit                     | 1.098                                                                                                                                               |
| Final R indices [ $>2\sigma(I)$ ]   | R <sub>1</sub> = 0.0937, wR <sub>2</sub> = 0.2260                                                                                                   |
| R indices [all data]                | R <sub>1</sub> = 0.1040, wR <sub>2</sub> = 0.2397                                                                                                   |
| Largest diff. peak and hole         | 4.592 and -2.755 e·Å <sup>-3</sup>                                                                                                                  |

$R = \sum ||F_o| - |F_c|| / \sum |F_o|$ ,  $wR = \{ \sum [w(|F_o|^2 - |F_c|^2)^2] / \sum [w(|F_o|^4)] \}^{1/2}$  and calc  $w = 1 / [\sigma^2(F_o^2) + (0.2P)^2]$   
where  $P = (F_o^2 + 2F_c^2) / 3$

**Supplementary Table 13. Atomic coordinates and equivalent isotropic atomic displacement parameters (Å<sup>2</sup>) of NbOI<sub>2</sub> at 10.7 GPa.**

| Label | x           | y        | z           | Occupancy | Site | U <sub>eq</sub> * |
|-------|-------------|----------|-------------|-----------|------|-------------------|
| I001  | 0.3550 (10) | 1.000000 | 0.9348 (6)  | 1         | 4i   | 0.012 (3)         |
| I002  | 0.3260 (10) | 1.000000 | 0.4010 (10) | 1         | 4i   | 0.012 (3)         |
| Nb03  | 0.4964 (13) | 1.000000 | 0.7093 (10) | 1         | 4i   | 0.010 (2)         |
| O004  | 0.498 (10)  | 0.500000 | 0.723 (7)   | 1         | 4i   | 0.030 (18)        |

\*U<sub>eq</sub> is defined as one third of the trace of the orthogonalized U<sub>ij</sub> tensor.

**Supplementary Table 14. Anisotropic atomic displacement parameters ( $\text{\AA}^2$ ) of NbOI<sub>2</sub> at 10.7 GPa.**

| Label | U <sub>11</sub> | U <sub>22</sub> | U <sub>33</sub> | U <sub>12</sub> | U <sub>13</sub> | U <sub>23</sub> |
|-------|-----------------|-----------------|-----------------|-----------------|-----------------|-----------------|
| I001  | 0.014 (9)       | 0.005 (2)       | 0.015 (3)       | 0.000           | −0.002 (4)      | 0.000           |
| I002  | 0.013 (9)       | 0.003 (2)       | 0.018 (2)       | 0.000           | 0.000 (4)       | 0.000           |
| Nb03  | 0.010 (3)       | 0.006 (2)       | 0.014 (2)       | 0.000           | 0.002 (2)       | 0.000           |
| O004  | 0.03 (4)        | 0.02 (2)        | 0.05 (2)        | 0.000           | 0.03 (3)        | 0.000           |

The anisotropic displacement factor exponent takes the form:  $-2\pi^2[h^2a^{*2}U_{11} + \dots + 2hka^*b^*U_{12}]$ .

**Supplementary Table 15. Bond lengths ( $\text{\AA}$ ) of NbOI<sub>2</sub> at 10.7 GPa.**

| Label       | Distances  | Label        | Distances  |
|-------------|------------|--------------|------------|
| I001—Nb03i  | 2.788 (15) | Nb03—Nb03ii  | 3.050 (10) |
| I001—Nb03   | 2.795 (18) | Nb03—O004iii | 1.889 (2)  |
| I002—Nb03ii | 2.68 (2)   | Nb03—O004    | 1.889 (2)  |
| I002—Nb03   | 2.714 (18) |              |            |

Symmetry codes: (i)  $-x+1, -y+2, -z+2$ ; (ii)  $-x+1, -y+2, -z+1$ ; (iii)  $x, y+1, z$ ; (iv)  $x, y-1, z$ .

**Supplementary Table 16. Bond angles ( $^\circ$ ) of NbOI<sub>2</sub> at 10.7 GPa.**

| Label                                       | Angles     | Label                                        | Angles    |
|---------------------------------------------|------------|----------------------------------------------|-----------|
| Nb03 <sup>i</sup> —I001—Nb03                | 96.8 (6)   | O004 <sup>iii</sup> —Nb03—I001 <sup>i</sup>  | 87 (3)    |
| Nb03 <sup>ii</sup> —I002—Nb03               | 68.8 (4)   | O004 <sup>iii</sup> —Nb03—I001               | 88 (3)    |
| I001 <sup>i</sup> —Nb03—I001                | 83.2 (6)   | O004—Nb03—I001 <sup>i</sup>                  | 87 (3)    |
| I001—Nb03—Nb03 <sup>ii</sup>                | 141.5 (10) | O004—Nb03—I001                               | 88 (3)    |
| I001 <sup>i</sup> —Nb03—Nb03 <sup>ii</sup>  | 135.3 (9)  | O004 <sup>iii</sup> —Nb03—I002 <sup>ii</sup> | 91 (3)    |
| I002—Nb03—I001 <sup>i</sup>                 | 169.6 (5)  | O004—Nb03—I002                               | 92 (3)    |
| I002—Nb03—I001                              | 86.4 (7)   | O004—Nb03—I002 <sup>ii</sup>                 | 91 (3)    |
| I002 <sup>ii</sup> —Nb03—I001               | 162.5 (7)  | O004 <sup>iii</sup> —Nb03—I002               | 92 (3)    |
| I002 <sup>ii</sup> —Nb03—I001 <sup>i</sup>  | 79.2 (6)   | O004—Nb03—Nb03 <sup>ii</sup>                 | 92.9 (13) |
| I002 <sup>ii</sup> —Nb03—I002               | 111.2 (4)  | O004 <sup>iii</sup> —Nb03—Nb03 <sup>ii</sup> | 92.9 (13) |
| I002—Nb03—Nb03 <sup>ii</sup>                | 55.1 (6)   | O004 <sup>iii</sup> —Nb03—O004               | 174 (3)   |
| I002 <sup>ii</sup> —Nb03—Nb03 <sup>ii</sup> | 56.1 (5)   | Nb03 <sup>iv</sup> —O004—Nb03                | 174 (3)   |

Symmetry codes: (i)  $-x+1, -y+2, -z+2$ ; (ii)  $-x+1, -y+2, -z+1$ ; (iii)  $x, y+1, z$ ; (iv)  $x, y-1, z$ .

**Supplementary Table 17. Experimental structure refinement of NbOCl<sub>2</sub> at 500 K.**

|                                          |                                                                                                                                             |
|------------------------------------------|---------------------------------------------------------------------------------------------------------------------------------------------|
| Empirical formula                        | NbOCl <sub>2</sub>                                                                                                                          |
| Formula weight                           | 179.81                                                                                                                                      |
| Temperature                              | 500 K                                                                                                                                       |
| Wavelength                               | 0.71073 Å                                                                                                                                   |
| Crystal system                           | Monoclinic                                                                                                                                  |
| Space group                              | <i>C2/c</i>                                                                                                                                 |
| Unit cell dimensions                     | <i>a</i> = 12.9128(15) Å, $\alpha$ = 90.00°<br><i>b</i> = 3.8993(5) Å, $\beta$ = 105.295(5)°<br><i>c</i> = 13.4507(17) Å, $\gamma$ = 90.00° |
| Volume                                   | 653.27(14) Å <sup>3</sup>                                                                                                                   |
| <i>Z</i>                                 | 8                                                                                                                                           |
| Density (calculated)                     | 3.656 g/cm <sup>3</sup>                                                                                                                     |
| Absorption coefficient                   | 5.04 mm <sup>-1</sup>                                                                                                                       |
| <i>F</i> (000)                           | 664                                                                                                                                         |
| Crystal size                             | 0.040 x 0.034 x 0.033 mm <sup>3</sup>                                                                                                       |
| $\theta$ range for data collection       | 3.1 to 27.9°                                                                                                                                |
| Index ranges                             | -16 ≤ <i>h</i> ≤ 16, -5 ≤ <i>k</i> ≤ 5, -17 ≤ <i>l</i> ≤ 17                                                                                 |
| Reflections collected                    | 2493                                                                                                                                        |
| Independent reflections                  | 772 [ <i>R</i> (int) = 0.058]                                                                                                               |
| Coverage of independent reflections      | 99.0%                                                                                                                                       |
| Refinement method                        | Full-matrix least-squares on <i>F</i> <sup>2</sup>                                                                                          |
| Data / restraints / parameters           | 772 / 0 / 37                                                                                                                                |
| Goodness-of-fit                          | 1.159                                                                                                                                       |
| Final <i>R</i> indices [ $>2\sigma(I)$ ] | <i>R</i> <sub>obs</sub> = 0.078, <i>wR</i> <sub>obs</sub> = 0.160                                                                           |
| <i>R</i> indices [all data]              | <i>R</i> <sub>all</sub> = 0.103, <i>wR</i> <sub>all</sub> = 0.171                                                                           |
| Largest diff. peak and hole              | 1.834 and -2.217 e·Å <sup>-3</sup>                                                                                                          |

$R = \Sigma ||F_o| - |F_c|| / \Sigma |F_o|$ ,  $wR = \{\Sigma [w(|F_o|^2 - |F_c|^2)^2] / \Sigma [w(|F_o|^4)]\}^{1/2}$  and calc  
 $w = 1/[\sigma^2(F_o^2) + (0.0725P)^2 + 26.6676P]$  where  $P = (F_o^2 + 2F_c^2)/3$

**Supplementary Table 18. Experimental atomic coordinates and equivalent isotropic atomic displacement parameters (Å<sup>2</sup>) of NbOCl<sub>2</sub> at 500 K.**

| Label | <i>x</i>    | <i>y</i>    | <i>z</i>    | Occupancy | <i>U</i> <sub>eq</sub> <sup>*</sup> |
|-------|-------------|-------------|-------------|-----------|-------------------------------------|
| Nb1   | 0.49955 (8) | 0.0561 (3)  | 0.36095 (9) | 1         | 0.0192 (4)                          |
| O3    | 0.4984 (7)  | 0.513 (2)   | 0.3631 (7)  | 1         | 0.024 (2)                           |
| Cl1   | 0.6346 (3)  | -0.0006 (9) | 0.5334 (2)  | 1         | 0.0283 (8)                          |
| Cl2   | 0.3459 (3)  | 0.0076 (9)  | 0.2107 (2)  | 1         | 0.0287 (8)                          |

\**U*<sub>eq</sub> is defined as one third of the trace of the orthogonalized *U*<sub>ij</sub> tensor.

**Supplementary Table 19. Experimental anisotropic atomic displacement parameters ( $\text{\AA}^2$ ) of NbOCl<sub>2</sub> at 500 K.**

| Label | U <sub>11</sub> | U <sub>22</sub> | U <sub>33</sub> | U <sub>12</sub> | U <sub>13</sub> | U <sub>23</sub> |
|-------|-----------------|-----------------|-----------------|-----------------|-----------------|-----------------|
| Nb1   | 0.0279 (6)      | 0.0110 (6)      | 0.0196 (6)      | 0.0004 (5)      | 0.0077 (4)      | 0.0001 (5)      |
| O3    | 0.041 (5)       | 0.009 (5)       | 0.028 (5)       | 0.003 (4)       | 0.018 (4)       | 0.005 (5)       |
| Cl1   | 0.0304 (16)     | 0.034 (2)       | 0.0201 (15)     | 0.0001 (13)     | 0.0061 (12)     | 0.0018 (15)     |
| Cl2   | 0.0290 (15)     | 0.033 (2)       | 0.0252 (16)     | −0.0009 (13)    | 0.0099 (13)     | −0.0007 (15)    |

The anisotropic displacement factor exponent takes the form:  $-2\pi^2[h^2a^{*2}U_{11} + \dots + 2hkb^*c^*U_{23}]$ .

**Supplementary Table 20. Experimental bond lengths ( $\text{\AA}$ ) of NbOCl<sub>2</sub> at 500 K.**

| Label                 | Distances | Label                  | Distances |
|-----------------------|-----------|------------------------|-----------|
| Nb1—O3                | 1.781 (8) | Nb1—Cl1                | 2.517 (3) |
| Nb1—O3 <sup>i</sup>   | 2.119 (8) | Nb1—Cl1 <sup>iii</sup> | 2.522 (3) |
| Nb1—Cl2               | 2.438 (3) | Nb1—Nb1 <sup>ii</sup>  | 2.988 (2) |
| Nb1—Cl2 <sup>ii</sup> | 2.441 (3) |                        |           |

Symmetry codes: (i)  $x, y-1, z$ ; (ii)  $-x+1, y, -z+1/2$ ; (iii)  $-x+1, -y, -z+1$ ; (iv)  $x, y+1, z$ .

**Supplementary Table 21. Experimental bond angles ( $^\circ$ ) of NbOCl<sub>2</sub> at 500 K.**

| Label                                   | Angles      | Label                                     | Angles      |
|-----------------------------------------|-------------|-------------------------------------------|-------------|
| O3—Nb1—O3 <sup>i</sup>                  | 177.9 (5)   | Cl2—Nb1—Cl1 <sup>iii</sup>                | 86.04 (11)  |
| O3—Nb1—Cl2                              | 94.8 (3)    | Cl2 <sup>ii</sup> —Nb1—Cl1 <sup>iii</sup> | 165.86 (12) |
| O3 <sup>i</sup> —Nb1—Cl2                | 85.8 (3)    | Cl1—Nb1—Cl1 <sup>iii</sup>                | 83.39 (11)  |
| O3—Nb1—Cl2 <sup>ii</sup>                | 95.5 (3)    | O3—Nb1—Nb1 <sup>ii</sup>                  | 91.1 (3)    |
| O3 <sup>i</sup> —Nb1—Cl2 <sup>ii</sup>  | 86.4 (2)    | O3 <sup>i</sup> —Nb1—Nb1 <sup>ii</sup>    | 90.9 (2)    |
| Cl2—Nb1—Cl2 <sup>ii</sup>               | 103.77 (11) | Cl2—Nb1—Nb1 <sup>ii</sup>                 | 52.29 (8)   |
| O3—Nb1—Cl1                              | 94.6 (3)    | Cl2 <sup>ii</sup> —Nb1—Nb1 <sup>ii</sup>  | 52.18 (8)   |
| O3 <sup>i</sup> —Nb1—Cl1                | 84.5 (3)    | Cl1—Nb1—Nb1 <sup>ii</sup>                 | 137.42 (10) |
| Cl2—Nb1—Cl1                             | 166.34 (12) | Cl1 <sup>iii</sup> —Nb1—Nb1 <sup>ii</sup> | 138.32 (9)  |
| Cl2 <sup>ii</sup> —Nb1—Cl1              | 85.26 (11)  | Nb1—Cl1—Nb1 <sup>iii</sup>                | 96.61 (11)  |
| O3—Nb1—Cl1 <sup>iii</sup>               | 93.8 (3)    | Nb1—Cl2—Nb1 <sup>ii</sup>                 | 75.52 (11)  |
| O3 <sup>i</sup> —Nb1—Cl1 <sup>iii</sup> | 84.2 (2)    | Nb1—O3—Nb1 <sup>iv</sup>                  | 177.9 (5)   |

Symmetry codes: (i)  $x, y-1, z$ ; (ii)  $-x+1, y, -z+1/2$ ; (iii)  $-x+1, -y, -z+1$ ; (iv)  $x, y+1, z$ .

## References

- [1] Schäfer H, Schnering H G. Metall-Metall-Bindungen bei niederen Halogeniden, Oxyden und Oxydhalogeniden schwerer Übergangsmetalle Thermochemische und strukturelle Prinzipien. *Angewandte Chemie* 1964, 76, 833-849.
- [2] Guo, Q.; Qi, X.-Z.; Zhang, L.; Gao, M.; Hu, S.; Zhou, W.; Zang, W.; Zhao, X.; Wang, J.; Yan, B.; Xu, M.; Wu, Y.-K.; Eda, G.; Xiao, Z.; Yang, S. A.; Gou, H.; Feng, Y. P.; Guo, G.-C.; Zhou, W.; Ren, X.-F.; Qiu, C.-W.; Pennycook, S. J.; Wee, A. T. S. Ultrathin quantum light source with van der Waals NbOCl<sub>2</sub> crystal. *Nature* 2023, 613, 53–59.
